# Supplementary material for: Selective deoxygenation of polar polymers using metal supported on TiO2 nanotubes
Source: Royal Society of Chemistry journal article supplement (doi:10.1039/d4cy00404c), 2024-01-01
Supplement: d4cy00404c1.pdf [file d4cy00404c1.pdf]

## Supporting Information

### Selective deoxygenation of polar polymers using metal supported on TiO<sub>2</sub> nanotubes

Dai-Phat Bui, Laura A. Gomez, Ismael Alaq, Luis Trevisi, Ana Carolina Jerdy, Han K. Chau,  
Lance L. Lobban, Steven P. Crossley\*

<sup>a</sup>School of Chemical, Biological and Materials Engineering, University of Oklahoma, Norman,  
OK 73019, United States

\*Corresponding author. Email: stevencrossley@ou.edu

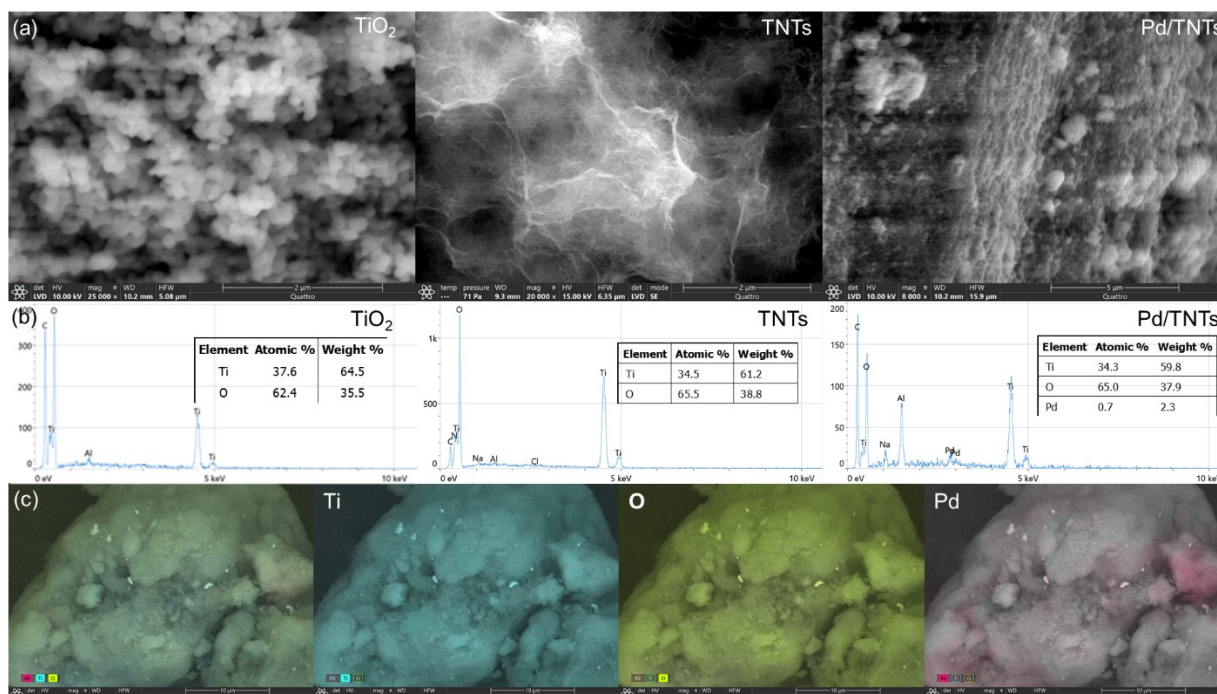

**Figure S1.** (a) SEM images and (b) EDX spectra of TiO<sub>2</sub>, TNTs, and Pd/TNTs. (c) EDX mapping of Pd/TNTs. The SEM images show that the source TiO<sub>2</sub> is nanoparticles, while TNTs and Pd/TNTs have clusters of tubes. The EDX spectra determine that there is about 2 wt% of Pd in TNTs. The EDX mapping confirmed the good distribution of Pd over TNTs catalyst.

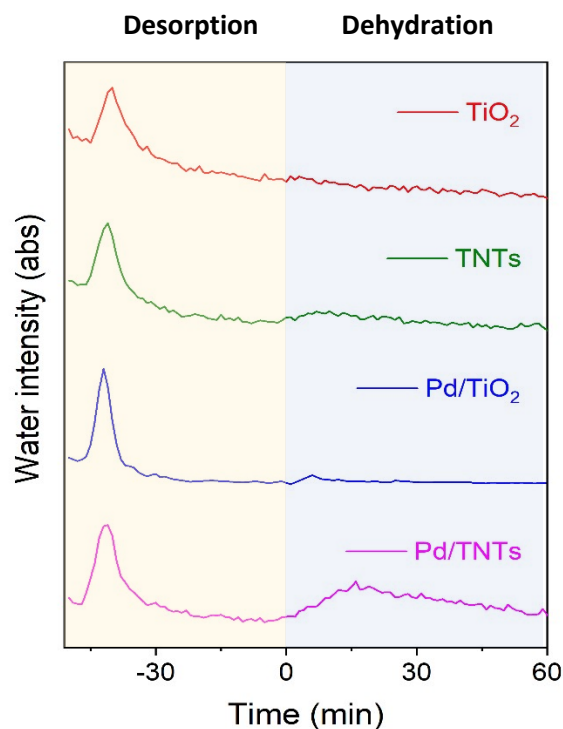

**Figure S2.** Mass spectrometry results for the dehydration and hydrogenation of EVOH over TiO<sub>2</sub>, TNTs, Pd/TiO<sub>2</sub>, and Pd/TNTs obtained during TGA analysis. Only water was released from the reactions. Reaction conditions:  $W_{\text{cat.}} = 2 \text{ mg}$ ,  $W_{\text{EVOH}} = 20 \text{ mg}$ ,  $F_{\text{H}_2} = 40 \text{ mL/min}$  and  $T_{\text{reaction}} = 195^\circ\text{C}$ .

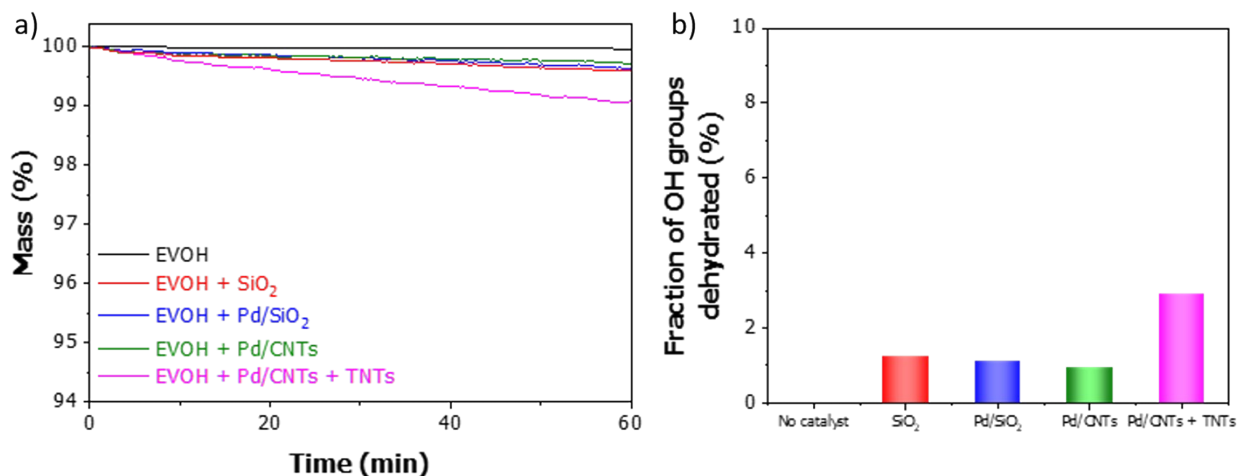

**Figure S3.** (a) TGA results of dehydration and hydrogenation of EVOH over SiO<sub>2</sub>, Pd/SiO<sub>2</sub>, Pd/CNTs, Pd/CNTs + TNTs, and without catalyst. (b) Dehydration percentage and rate of EVOH over SiO<sub>2</sub>, Pd/SiO<sub>2</sub>, Pd/CNTs, Pd/CNTs + TNTs and without catalyst. Reaction conditions:  $T_{\text{reaction}} = 195^\circ\text{C}$ ,  $W_{\text{cat.}} = 2 \text{ mg}$ ,  $W_{\text{EVOH}} = 20 \text{ mg}$  and  $F_{\text{H}_2} = 40 \text{ ml/min}$ .

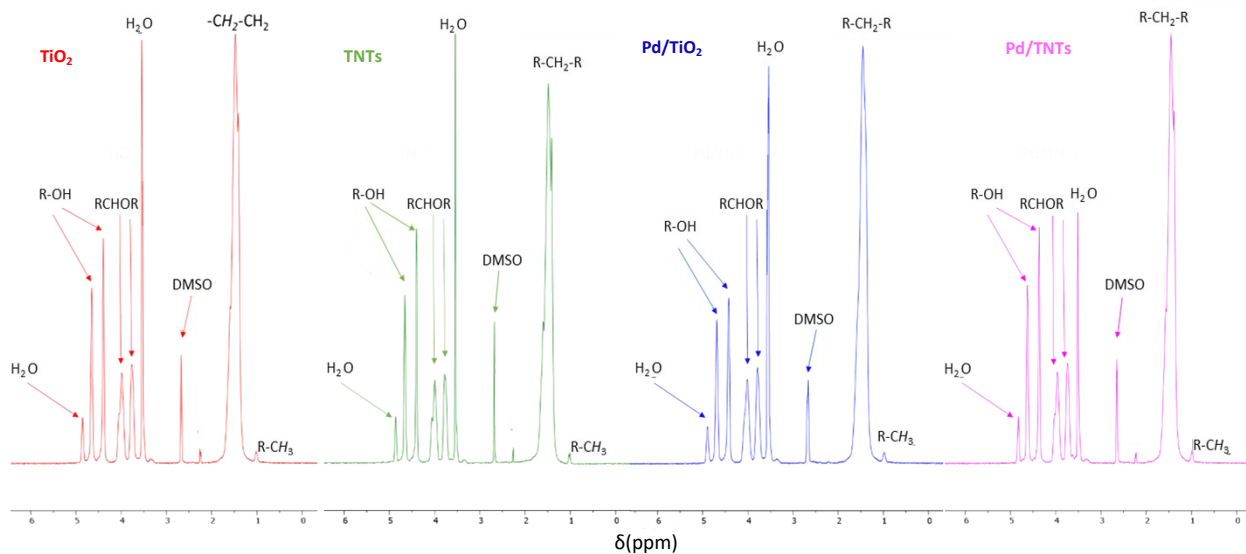

**Figure S4.** NMR results of the products from the EVOH conversion conducted in a TGA crucible. Reaction conditions:  $W_{\text{cat.}} = 2 \text{ mg}$ ,  $W_{\text{EVOH}} = 20 \text{ mg}$ ,  $F_{\text{H}_2} = 40 \text{ mL/min}$  and  $T_{\text{reaction}} = 195^\circ\text{C}$ .

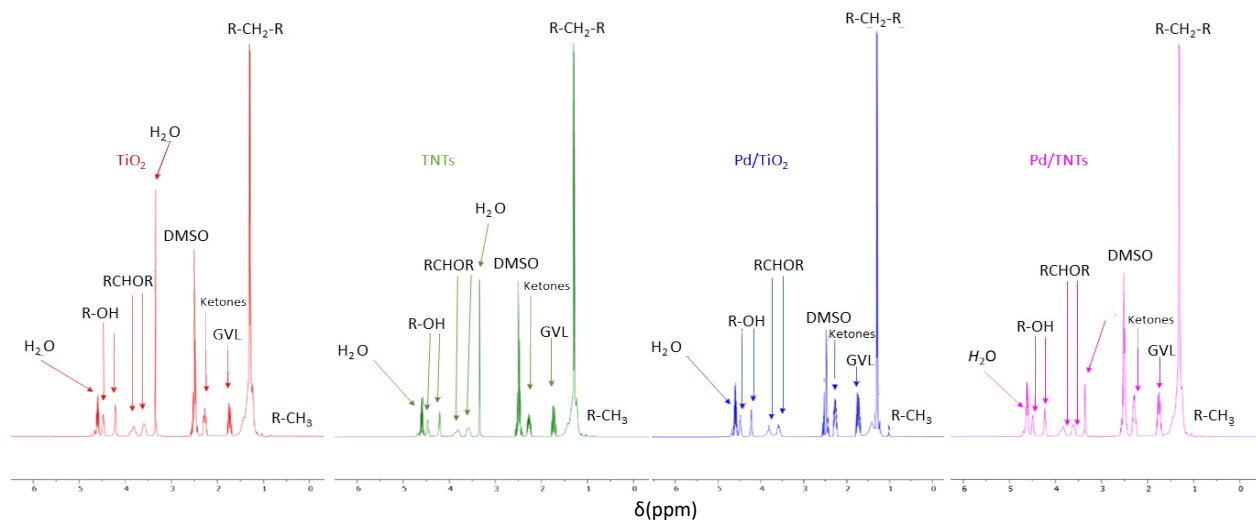

**Figure S5.** NMR results of the products from the EVOH conversion conducted in a semi-batch reactor. Reaction conditions:  $W_{\text{cat.}} = 10 \text{ mg}$ ,  $W_{\text{EVOH}} = 100 \text{ mg}$ ,  $F_{\text{H}_2} = 60 \text{ mL/min}$ ,  $T_{\text{reaction}} = 195^\circ\text{C}$ , TOS = 1 h. For all the cases, 2 mL of GVL was used as a solvent.

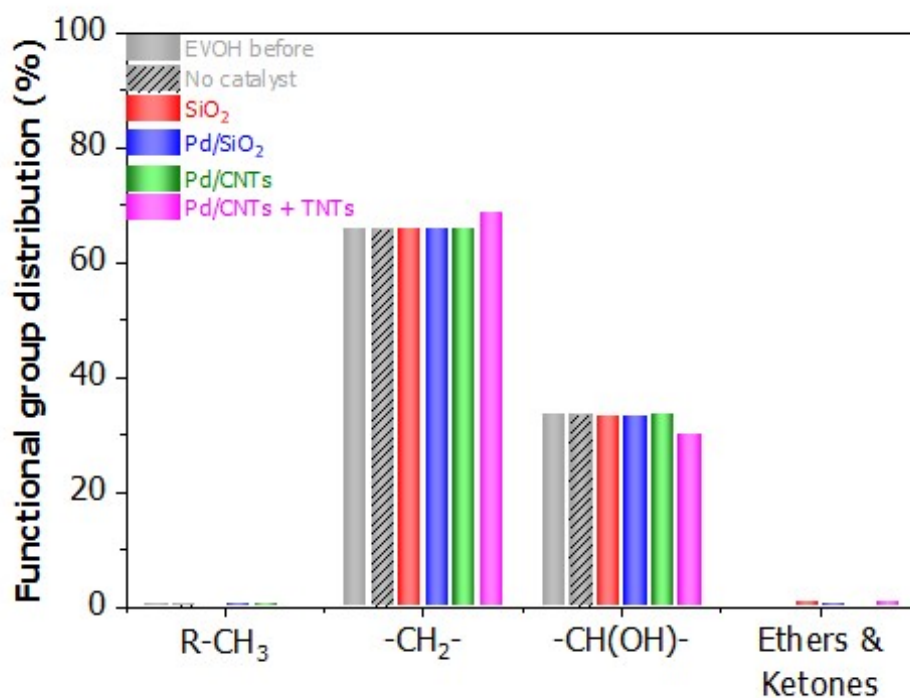

**Figure S6.** Dehydration of EVOH and product percentage over the catalysts without metal or acid sites in a semi-batch reactor. Reaction conditions:  $W_{\text{cat}}=10$  mg,  $W_{\text{EVOH}}=100$  mg,  $F_{\text{H}_2}=60$  mL/min,  $T_{\text{reaction}}=195^\circ\text{C}$ , TOS= 1 h. 2 mL of GVL was used as a solvent for all the cases. For the physical mixture of Pd/CNT + TNTs, 20mg of Pd/CNT and 20mg TNTs were used. The quantities for the functional groups related to ether and ketones were added together.

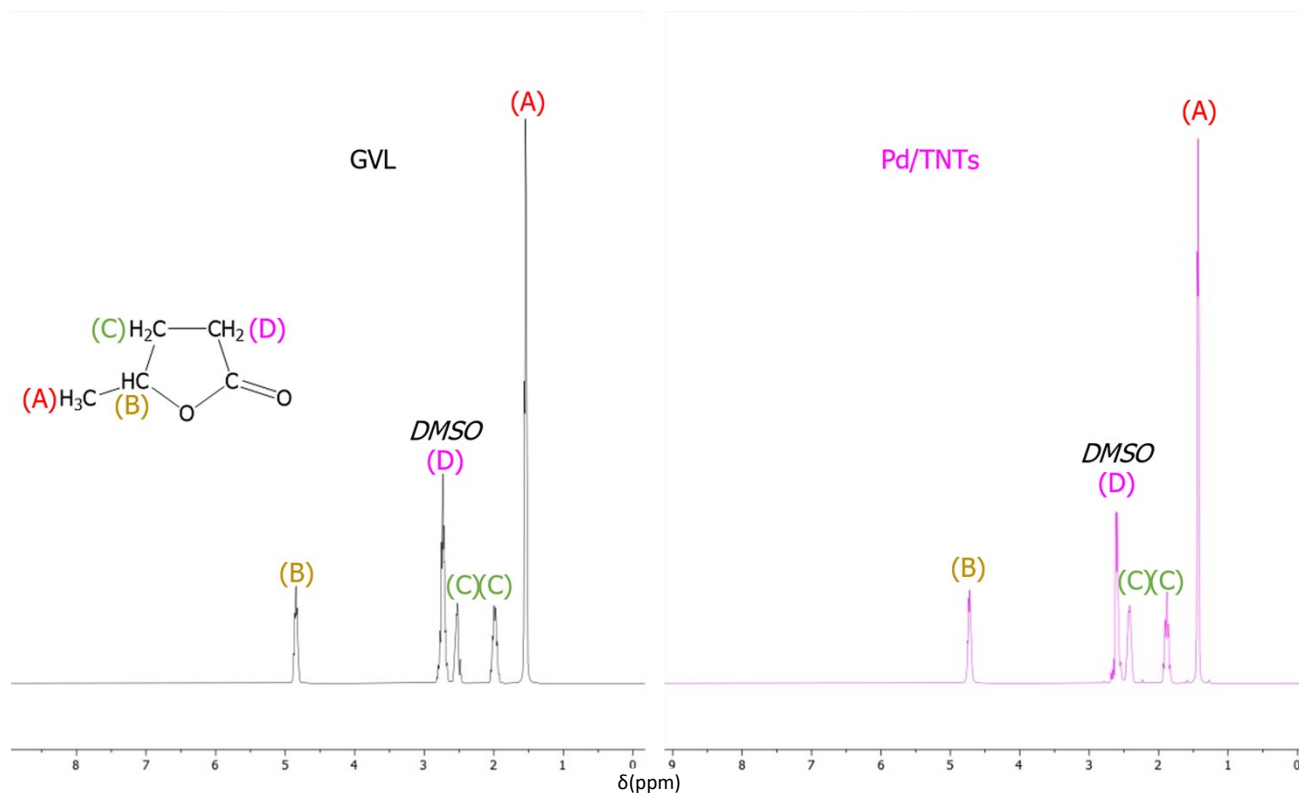

**Figure S7.** NMR results of the GVL solvent before the reaction and from the EVOH conversion conducted in a semi-batch reactor with  $W_{\text{cat}}=30$  mg,  $W_{\text{EVOH}}=100$  mg,  $F_{\text{H}_2}=60$  mL/min,  $T_{\text{reaction}}=195$  °C, TOS= 12 h. For all the cases, 2 mL of GVL was used as a solvent. There is no new peak corresponding to the hydrogenation of GVL.

| <b>Pellets EVOH<br/>(EVOH before cryomilling)</b>                                                                                                                                                                                                            | <b>R-CH<sub>3</sub></b>                         | <b>R-CH<sub>2</sub>-R</b> | <b>R-OH</b> | <b>RCHOR</b> | <b>Ethers</b>                          | <b>Ketones</b> |
|--------------------------------------------------------------------------------------------------------------------------------------------------------------------------------------------------------------------------------------------------------------|-------------------------------------------------|---------------------------|-------------|--------------|----------------------------------------|----------------|
| <b>Area</b>                                                                                                                                                                                                                                                  | 722.8                                           | 66529.8                   | 17295.7     | 16845.2      | Area of R-OH<br>minus Area of<br>RCHOR | 0              |
| <b>Number of protons</b>                                                                                                                                                                                                                                     | 3                                               | 2                         | 1           | 1            | 1                                      | 4              |
| <b>Normalized area<br/>(Area/Number of protons)</b>                                                                                                                                                                                                          | 220.9                                           | 33264.9                   | 17295.7     | 16845.2      | 112.6                                  | 0              |
| <b>Total area</b>                                                                                                                                                                                                                                            | 220.9 + 33264.9 + 16845.2 + 112.6 + 0 = 50443.7 |                           |             |              |                                        |                |
| <b>% (Normalized area/Total<br/>area)</b>                                                                                                                                                                                                                    | 0.4%                                            | 65.9%                     | 33.4%       | N/A          | 0.1%                                   | 0%             |
| <b>Estimated M<sub>W</sub> = M<sub>R-CH<sub>2</sub></sub> × %<sub>R-CH<sub>2</sub></sub> / (%<sub>R-CH<sub>3</sub></sub> / 2) + M<sub>R-OH</sub> × %<sub>R-OH</sub> / (%<sub>R-CH<sub>3</sub></sub> / 2) + 2 × M<sub>CH<sub>3</sub></sub> ≈ 9653 (g/mol)</b> |                                                 |                           |             |              |                                        |                |
| <b>Cryomilled EVOH<br/>(EVOH in this work)</b>                                                                                                                                                                                                               |                                                 |                           |             |              |                                        |                |
| <b>Area</b>                                                                                                                                                                                                                                                  | 609.0                                           | 72131.0                   | 18687.0     | 18406.2      | Area of R-OH<br>minus Area of<br>RCHOR | 0              |
| <b>Number of protons</b>                                                                                                                                                                                                                                     | 3                                               | 2                         | 1           | 1            | 1                                      | 4              |
| <b>Normalized area<br/>(Area/Number of protons)</b>                                                                                                                                                                                                          | 203.0                                           | 36065.5                   | 18687.0     | 18406.2      | 70.2                                   | 0              |
| <b>Total area</b>                                                                                                                                                                                                                                            | 203.0 + 36065.5 + 18406.2 + 70.2 = 54744.9      |                           |             |              |                                        |                |
| <b>% (Normalized area/Total<br/>area)</b>                                                                                                                                                                                                                    | 0.4%                                            | 65.9%                     | 33.6%       | N/A          | 0.1%                                   | 0%             |
| <b>Estimated M<sub>W</sub> = M<sub>R-CH<sub>2</sub></sub> × %<sub>R-CH<sub>2</sub></sub> / (%<sub>R-CH<sub>3</sub></sub> / 2) + M<sub>R-OH</sub> × %<sub>R-OH</sub> / (%<sub>R-CH<sub>3</sub></sub> / 2) + 2 × M<sub>CH<sub>3</sub></sub> ≈ 9683 (g/mol)</b> |                                                 |                           |             |              |                                        |                |

**Table S1.** NMR characterization of EVOH pellets and cryomilled EVOH.

| <b>Sample</b>       | <b>surface area<br/>(m<sup>2</sup>/g)</b> | <b>Pore volume<br/>(cm<sup>3</sup>/g)</b> |
|---------------------|-------------------------------------------|-------------------------------------------|
| Pd/TNTs             | 180.99                                    | 0.37                                      |
| Pd/CNTs             | 259.44                                    | 0.65                                      |
| Pd/SiO <sub>2</sub> | 310.38                                    | 1.21                                      |

**Table S2.** Surface area and pore volume of Pd-supported catalysts.

| Functional groups | Structure | Shift (ppm) |
|-------------------|-----------|-------------|
| R-CH <sub>3</sub> |           | 0.7-0.9     |
| R-CH <sub>2</sub> |           | 1-1.66      |
| RCHOR             |           | 3.4-4.0     |
| R-OH              |           | 4.0-4.6     |
| Ketones           |           | 1.8-2.3     |

**Table S3.** H NMR chemical shift ranges of the functional groups involved in the deoxygenation of EVOH
